# Supplementary material for: Comparative GC-MS Analysis of Fresh and Dried Curcuma Essential Oils with Insights into Their Antioxidant and Enzyme Inhibitory Activities
Source: MDPI journal article supplement (doi:10.3390/plants12091785), 2023-04-27
Supplement: s1 [file s1]

### Supplementary Information

Major components present in fresh hydrodistilled, fresh hexane-extracted, dried hydrodistilled, and dried hexane-extracted turmeric oil samples.

| Compound name                                 | Fresh samples      |                      | Dried samples      |                      | Chemical structure                                                                    |
|-----------------------------------------------|--------------------|----------------------|--------------------|----------------------|---------------------------------------------------------------------------------------|
|                                               | Hydrodistilled oil | Hexane-extracted oil | Hydrodistilled oil | Hexane extracted oil |                                                                                       |
| Tumerone                                      | 60.8               | 51.6                 | 6.0                | ----                 | 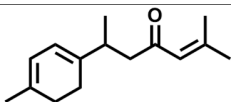   |
| Curlone                                       | 15.6               | 17.0                 | 5.7                | 10.4                 |    |
| Terpinolene                                   | 4.4                | 0.43                 | ----               | ----                 |    |
| Caryophylla-4(12), 8(13)-dien-5- $\alpha$ -ol | 3.8                | ----                 | ----               | ----                 |   |
| neo-intermedeol                               | 3.2                | ----                 | ----               | ----                 |  |
| Zingiberene                                   | 1.5                | 5.9                  | ----               | 3.7                  |  |
| $\beta$ -Sesquiphellandrene                   | 1.0                | 4.2                  | 2.3                | 6.7                  |  |
| D-Limonene                                    | ----               | ----                 | 23.2               | ----                 |  |
| Caryophyllene oxide                           | ----               | ----                 | 5.7                | ----                 |  |
| Caryophyllene                                 | 0.35               | 0.97                 | 4.5                | 0.16                 |  |
| ar-Turmerone                                  | ----               | ----                 | 16.2               | 26.2                 |  |
| $\alpha$ -Curcumene                           | ----               | 0.77                 | 2.3                | 3.7                  |  |
